# Supplementary material for: Protein intake in early childhood and cardiometabolic health at school age: the Generation R Study
Source: PubMed Central journal article supplement (PMC5009172; doi:10.1007/s00394-015-1026-7), 2015-09-02
Supplement: 394_2015_1026_MOESM1_ESM.pdf [file 394_2015_1026_MOESM1_ESM.pdf]

## ELECTRONIC SUPPLEMENTARY MATERIAL

**Supplemental Table S1. Characteristics of subjects with and without child blood samples.**

|                                                     | With blood samples<br>(n = 2,006) | Without blood samples<br>(n = 959) |
|-----------------------------------------------------|-----------------------------------|------------------------------------|
| <b>Maternal characteristics</b>                     |                                   |                                    |
| Maternal age (y)                                    | 31.9 (22.1-39.9)                  | 31.7 (21.0-39.6)                   |
| Maternal BMI at enrollment (kg/m <sup>2</sup> )     | 23.4 (18.9-35.2)                  | 23.6 (18.8-36.0)                   |
| Education level (%)                                 |                                   |                                    |
| - Primary                                           | 5.6                               | 6.2                                |
| - Secondary                                         | 35.0                              | 36.7                               |
| - Higher                                            | 59.4                              | 57.1                               |
| Smoking during pregnancy (%)                        |                                   |                                    |
| - Never                                             | 78.5                              | 78.3                               |
| - Until pregnancy was known                         | 10.0                              | 9.7                                |
| - Continued                                         | 11.5                              | 12.0                               |
| <b>Child characteristics</b>                        |                                   |                                    |
| Girls (%)                                           | 48.8                              | 55.2                               |
| Dutch ethnicity (%)                                 | 69.2                              | 68.1                               |
| Gestational age at birth (wk)                       | 39.9 (1.7)                        | 40.0 (1.8)                         |
| Birth weight (g)                                    | 3482 (550)                        | 3453 (552)                         |
| Breastfeeding (%)                                   |                                   |                                    |
| - Exclusive in the first 4 months                   | 29.2                              | 27.7                               |
| - Partial in the first 4 months                     | 61.7                              | 61.6                               |
| - Never                                             | 9.1                               | 10.7                               |
| <b>Child characteristics at dietary measurement</b> |                                   |                                    |
| Age at FFQ (mo)                                     | 12.9 (12.2-19.0)                  | 12.9 (12.2-18.8)                   |
| Total energy intake (kcal/d)                        | 1283 (664-2164)                   | 1245 (691-2279)                    |
| Protein intake (g/d)                                |                                   |                                    |
| - Total protein                                     | 41.4 (12.7)                       | 40.8 (13.1)                        |
| - Animal protein                                    | 25.9 (10.1)                       | 25.3 (10.6)                        |
| - Vegetable protein                                 | 15.0 (5.6)                        | 14.9 (5.8)                         |
| Protein intake (E%)                                 |                                   |                                    |
| - Total protein                                     | 12.9 (2.4)                        | 12.8 (2.4)                         |
| - Animal protein                                    | 8.1 (2.4)                         | 8.0 (2.5)                          |
| - Vegetable protein                                 | 4.6 (1.4)                         | 4.7 (1.4)                          |
| <b>Child characteristics at 6 y visit</b>           |                                   |                                    |
| Age (y)                                             | 5.9 (5.7-6.6)                     | 5.9 (5.6-6.5)                      |
| Screen time (h/d)                                   | 1.3 (0.2-4.4)                     | 1.3 (0.2-4.2)                      |
| Participation in sports (%)                         | 43.9                              | 43.0                               |
| Height (cm)                                         | 118.4 (5.1)                       | 117.8 (5.3)                        |
| Weight (kg)                                         | 22.5 (3.3)                        | 22.3 (3.5)                         |
| BMI (kg/m <sup>2</sup> )                            | 16.0 (1.6)                        | 16.0 (1.7)                         |
| Body fat percentage (%)                             | 23.3 (16.2-36.1)                  | 24.1 (16.3-37.5)                   |
| Systolic blood pressure (mmHg)                      | 102 (8)                           | 103 (8)                            |
| Diastolic blood pressure (mmHg)                     | 60 (6)                            | 61 (7)                             |

Values are percentages for categorical variables, means (SD) for continuous variables with a normal distribution, or medians (95% range) for continuous variables with a skewed distribution.

Abbreviations: BMI, body mass index; E%, energy percentage; FFQ, food frequency questionnaire.

ELECTRONIC SUPPLEMENTARY MATERIAL

**Supplemental Table S2. Covariate-adjusted associations of total protein intake at the age of 1 year with cardiometabolic outcomes at 6 years, additionally adjusted for body fat percentage.**

|                          | <b>Insulin<br/>(SDS)</b> | <b>SBP<br/>(SDS)</b> | <b>DBP<br/>(SDS)</b>        | <b>HDL-C<br/>(SDS)</b> | <b>Triglycerides<br/>(SDS)</b> | <b>Cardiometabolic<br/>risk factor score</b> |
|--------------------------|--------------------------|----------------------|-----------------------------|------------------------|--------------------------------|----------------------------------------------|
| <b>Whole group</b>       | <i>n</i> = 1,996         | <i>n</i> = 2,841     | <i>n</i> = 2,841            | <i>n</i> = 2,006       | <i>n</i> = 2,001               | <i>n</i> = 1,894                             |
| <i>Per 10 g/d</i>        | 0.02 (-0.04, 0.08)       | -0.01 (-0.06, 0.04)  | -0.04 (-0.09, 0.00)         | 0.03 (-0.03, 0.08)     | <b>-0.07 (-0.13, -0.01)</b>    | -0.12 (-0.25, 0.01)                          |
| Tertile 1                | Reference                | Reference            | Reference                   | Reference              | Reference                      | Reference                                    |
| Tertile 2                | 0.04 (-0.07, 0.15)       | -0.08 (-0.17, 0.01)  | -0.03 (-0.11, 0.06)         | 0.05 (-0.05, 0.16)     | 0.08 (-0.19, 0.03)             | -0.13 (-0.37, 0.11)                          |
| Tertile 3                | 0.01 (-0.10, 0.11)       | -0.06 (-0.15, 0.03)  | <b>-0.10 (-0.18, -0.01)</b> | 0.05 (-0.05, 0.16)     | <b>-0.14 (-0.25, -0.03)</b>    | <b>-0.25 (-0.50, -0.01)</b>                  |
| P for trend <sup>#</sup> | 0.91                     | 0.22                 | <b>0.03</b>                 | 0.33                   | <b>0.01</b>                    | <b>0.04</b>                                  |
| <b>Girls</b>             | <i>n</i> = 980           | <i>n</i> = 1,426     | <i>n</i> = 1,457            | <i>n</i> = 1,457       | <i>n</i> = 984                 | <i>n</i> = 982                               |
| <i>Per 10 g/d</i>        | <b>0.10 (0.01, 0.19)</b> | -0.01 (-0.08, 0.07)  | -0.04 (-0.11, 0.03)         | 0.01 (-0.07, 0.09)     | -0.01 (-0.10, 0.08)            | 0.02 (-0.17, 0.23)                           |
| Tertile 1                | Reference                | Reference            | Reference                   | Reference              | Reference                      | Reference                                    |
| Tertile 2                | 0.09 (-0.06, 0.24)       | -0.05 (-0.17, 0.07)  | 0.02 (-0.10, 0.14)          | 0.02 (-0.13, 0.17)     | 0.02 (-0.14, 0.17)             | 0.03 (-0.33, 0.39)                           |
| Tertile 3                | 0.13 (-0.02, 0.29)       | -0.08 (-0.21, 0.04)  | -0.08 (-0.20, 0.05)         | 0.02 (-0.14, 0.17)     | 0.02 (-0.14, 0.17)             | 0.03 (-0.34, 0.40)                           |
| P for trend <sup>#</sup> | 0.10                     | 0.19                 | 0.23                        | 0.99                   | 0.88                           | 0.99                                         |
| <b>Boys</b>              | <i>n</i> = 1,422         | <i>n</i> = 1,016     | <i>n</i> = 1,381            | <i>n</i> = 1,384       | <i>n</i> = 1,384               | <i>n</i> = 1,017                             |
| <i>Per 10 g/d</i>        | -0.05 (-0.13, 0.03)      | -0.01 (-0.08, 0.06)  | -0.05 (-0.12, 0.01)         | 0.06 (-0.01, 0.14)     | <b>-0.12 (-0.21, -0.04)</b>    | <b>-0.24 (-0.42, -0.05)</b>                  |
| Tertile 1                | Reference                | Reference            | Reference                   | Reference              | Reference                      | Reference                                    |
| Tertile 2                | 0.05 (-0.10, 0.21)       | -0.12 (-0.24, 0.01)  | -0.06 (-0.19, 0.07)         | 0.06 (-0.10, 0.21)     | -0.08 (-0.23, 0.08)            | -0.22 (-0.58, 0.14)                          |
| Tertile 3                | -0.12 (-0.27, 0.04)      | -0.03 (-0.16, 0.09)  | <b>-0.13 (-0.25, 0.00)</b>  | 0.11 (-0.04, 0.27)     | <b>-0.26 (-0.41, -0.11)</b>    | <b>-0.57 (-0.92, -0.21)</b>                  |
| P for trend <sup>#</sup> | 0.13                     | 0.60                 | <b>0.05</b>                 | 0.16                   | <b>&lt;0.01</b>                | <b>&lt;0.01</b>                              |

Values are based on multivariable linear regression models and reflect differences (95%CI) in individual cardiometabolic outcomes (age and sex adjusted SD scores) and in cardiometabolic score score per 10 g/d increase in protein intake, and for tertiles of protein intake, as compared to the lowest tertile. Significant effect estimates are indicated in **bold**.

Protein intakes are energy-adjusted using the residual method. Tertiles are computed based on the total population for analysis (Figure 1, *n*=2,965).

Models are adjusted for maternal age, BMI, education, and smoking during pregnancy; and child's ethnicity, birth weight Z-score, breastfeeding in the first four months of life, age at dietary measurement, energy intake, fat intake, height-for-age at 6y, participation in sports at 6y, and screen time at 6y.

<sup>#</sup> Tests for trend were conducted using the tertiles of protein intake as a continuous variable.

Abbreviations: SDS, standard deviation score; BF%, body fat percentage; SBP, systolic blood pressure; DBP, diastolic blood pressure; HDL-C, high-density lipoprotein cholesterol.

ELECTRONIC SUPPLEMENTARY MATERIAL

**Supplemental Table S3. Covariate-adjusted associations of total protein intake at the age of 1 year with secondary cardiometabolic outcomes at 6 years.**

|                          | FMI<br>(SDS)             | C-peptide<br>(SDS)       | Total cholesterol<br>(SDS) | LDL cholesterol<br>(SDS) |
|--------------------------|--------------------------|--------------------------|----------------------------|--------------------------|
| <b>Whole group</b>       | <i>n</i> = 2,909         | <i>n</i> = 1,996         | <i>n</i> = 2,006           | <i>n</i> = 2,006         |
| <i>Per 10 g/d</i>        | <b>0.04 (0.00, 0.08)</b> | 0.04 (-0.02, 0.9)        | -0.01 (-0.07, 0.05)        | -0.01 (-0.07, 0.05)      |
| Tertile 1                | Reference                | Reference                | Reference                  | Reference                |
| Tertile 2                | 0.05 (-0.02, 0.12)       | 0.00 (-0.11, 0.11)       | 0.07 (-0.04, 0.17)         | 0.04 (-0.07, 0.15)       |
| Tertile 3                | <b>0.08 (0.01, 0.15)</b> | 0.00 (-0.11, 0.11)       | 0.05 (-0.06, 0.16)         | 0.05 (-0.05, 0.16)       |
| P for trend <sup>#</sup> | <b>0.03</b>              | 0.97                     | 0.37                       | 0.33                     |
| <b>Girls</b>             |                          | <i>n</i> = 980           | <i>n</i> = 1,457           | <i>n</i> = 1,457         |
| <i>Per 10 g/d</i>        | <b>0.06 (0.00, 0.11)</b> | <b>0.10 (0.02, 0.18)</b> | 0.01 (-0.07, 0.08)         | -0.01 (-0.09, 0.07)      |
| Tertile 1                | Reference                | Reference                | Reference                  | Reference                |
| Tertile 2                | <b>0.11 (0.02, 0.20)</b> | 0.06 (-0.09, 0.22)       | 0.09 (-0.06, 0.24)         | 0.07 (-0.08, 0.22)       |
| Tertile 3                | <b>0.10 (0.00, 0.19)</b> | 0.10 (-0.05, 0.26)       | 0.03 (-0.12, 0.18)         | 0.00 (-0.15, 0.15)       |
| P for trend <sup>#</sup> | <b>0.04</b>              | 0.08                     | 0.68                       | 0.98                     |
| <b>Boys</b>              |                          | <i>n</i> = 1,016         | <i>n</i> = 1,384           | <i>n</i> = 1,384         |
| <i>Per 10 g/d</i>        | 0.02 (-0.03, 0.07)       | -0.02 (-0.09, 0.06)      | -0.01 (-0.08, 0.07)        | -0.03 (-0.10, 0.05)      |
| Tertile 1                | Reference                | Reference                | Reference                  | Reference                |
| Tertile 2                | -0.02 (-0.12, 0.08)      | -0.07 (-0.22, 0.08)      | -0.06 (-0.21, 0.09)        | -0.09 (-0.24, 0.07)      |
| Tertile 3                | 0.04 (-0.06, 0.14)       | -0.12 (-0.27, 0.03)      | 0.02 (-0.14, 0.17)         | 0.01 (-0.15, 0.16)       |
| P for trend <sup>#</sup> | 0.45                     | 0.20                     | 0.83                       | 0.92                     |

Values are based on multivariable linear regression models and reflect differences (95%CI) in C-peptide and cholesterol levels (age and sex adjusted SD scores) per 10 g/d increase in protein intake, and for tertiles of protein intake, as compared to the lowest tertile. Significant effect estimates are indicated in **bold**.

Protein intakes are energy-adjusted using the residual method. Tertiles are computed based on the total population for analysis (Figure 1, *n*=2,965).

Models are adjusted for maternal age, BMI, education, and smoking during pregnancy; and child's ethnicity, birth weight Z-score, breastfeeding in the first four months of life, age at dietary measurement, energy intake, fat intake, height-for-age at 6y, weight-for-age at 6y, participation in sports at 6y, and screen time at 6y.

<sup>#</sup> Tests for trend were conducted using the tertiles of protein intake as a continuous variable.

Abbreviations: SDS, standard deviation score.

ELECTRONIC SUPPLEMENTARY MATERIAL

Supplemental Table S4. Crude associations of total protein intake at the age of 1 year with cardiometabolic outcomes at 6 years.

|                          | BF%<br>(SDS)             | Insulin<br>(SDS)         | SBP<br>(SDS)        | DBP<br>(SDS)                | HDL-C<br>(SDS)      | Triglycerides<br>(SDS)      | Cardiometabolic<br>risk factor score |
|--------------------------|--------------------------|--------------------------|---------------------|-----------------------------|---------------------|-----------------------------|--------------------------------------|
| <b>Whole group</b>       | <i>n</i> = 2,909         | <i>n</i> = 1,996         | <i>n</i> = 2,841    | <i>n</i> = 2,841            | <i>n</i> = 2,006    | <i>n</i> = 2,001            | <i>n</i> = 1,894                     |
| <i>Per 10 g/d</i>        | <b>0.06 (0.02, 0.11)</b> | 0.03 (-0.03, 0.09)       | 0.01 (-0.04, 0.06)  | -0.03 (-0.08, 0.02)         | 0.02 (-0.04, 0.08)  | <b>-0.07 (-0.13, -0.01)</b> | -0.05 (-0.20, 0.11)                  |
| Tertile 1                | Reference                | Reference                | Reference           | Reference                   | Reference           | Reference                   | Reference                            |
| Tertile 2                | 0.03 (-0.05, 0.11)       | 0.05 (-0.06, 0.15)       | -0.07 (-0.16, 0.02) | -0.03 (-0.11, 0.06)         | 0.05 (-0.06, 0.15)  | -0.07 (-0.18, 0.03)         | -0.12 (-0.41, 0.16)                  |
| Tertile 3                | <b>0.11 (0.03, 0.19)</b> | 0.03 (-0.09, 0.13)       | -0.02 (-0.11, 0.07) | <b>-0.08 (-0.17, -0.00)</b> | 0.03 (-0.07, 0.14)  | <b>-0.14 (-0.25, -0.03)</b> | -0.09 (-0.36, 0.18)                  |
| P for trend <sup>#</sup> | <b>&lt;0.01</b>          | 0.69                     | 0.70                | 0.11                        | 0.49                | <b>&lt;0.01</b>             | 0.51                                 |
| <b>Girls</b>             | <i>n</i> = 1,487         | <i>n</i> = 980           | <i>n</i> = 1,426    | <i>n</i> = 1,457            | <i>n</i> = 1,457    | <i>n</i> = 984              | <i>n</i> = 982                       |
| <i>Per 10 g/d</i>        | <b>0.09 (0.03, 0.15)</b> | <b>0.11 (0.02, 0.20)</b> | 0.02 (-0.05, 0.09)  | -0.03 (-0.10, 0.04)         | -0.01 (-0.10, 0.08) | -0.02 (-0.11, 0.07)         | 0.09 (-0.14, 0.31)                   |
| Tertile 1                | Reference                | Reference                | Reference           | Reference                   | Reference           | Reference                   | Reference                            |
| Tertile 2                | 0.08 (-0.03, 0.20)       | 0.10 (-0.05, 0.26)       | -0.05 (-0.17, 0.07) | 0.00 (-0.12, 0.11)          | 0.02 (-0.14, 0.16)  | 0.02 (-0.13, 0.18)          | 0.07 (-0.33, 0.46)                   |
| Tertile 3                | <b>0.12 (0.01, 0.23)</b> | <b>0.16 (0.00, 0.31)</b> | -0.06 (-0.19, 0.07) | -0.08 (-0.21, 0.04)         | -0.01 (-0.16, 0.15) | 0.00 (-0.16, 0.15)          | 0.13 (-0.28, 0.54)                   |
| P for trend <sup>#</sup> | <b>0.03</b>              | <b>0.04</b>              | 0.35                | 0.22                        | 0.94                | 0.99                        | 0.52                                 |
| <b>Boys</b>              | <i>n</i> = 1,422         | <i>n</i> = 1,016         | <i>n</i> = 1,381    | <i>n</i> = 1,384            | <i>n</i> = 1,384    | <i>n</i> = 1,017            | <i>n</i> = 1,013                     |
| <i>Per 10 g/d</i>        | 0.04 (-0.03, 0.10)       | -0.03 (-0.12, 0.05)      | 0.01 (-0.06, 0.08)  | -0.03 (-0.10, 0.04)         | 0.05 (-0.03, 0.13)  | <b>-0.12 (-0.20, -0.04)</b> | -0.15 (-0.35, 0.05)                  |
| Tertile 1                | Reference                | Reference                | Reference           | Reference                   | Reference           | Reference                   | Reference                            |
| Tertile 2                | -0.03 (-0.15, 0.09)      | 0.08 (-0.07, 0.23)       | -0.09 (-0.21, 0.04) | -0.05 (-0.18, 0.08)         | 0.04 (-0.11, 0.20)  | -0.08 (-0.23, 0.07)         | -0.15 (-0.54, 0.24)                  |
| Tertile 3                | 0.04 (-0.06, 0.17)       | -0.09 (-0.24, 0.06)      | 0.03 (-0.10, 0.15)  | -0.09 (-0.21, 0.04)         | 0.08 (-0.07, 0.23)  | <b>-0.24 (-0.39, -0.09)</b> | -0.35 (-0.74, 0.03)                  |
| P for trend <sup>#</sup> | 0.38                     | 0.21                     | 0.68                | 0.19                        | 0.29                | <b>&lt;0.01</b>             | 0.07                                 |

Values are based on multivariable linear regression models and reflect differences (95%CI) in individual cardiometabolic outcomes (age and sex adjusted SD scores) and in cardiometabolic score per 10 g/d increase in protein intake, and for tertiles of protein intake, as compared to the lowest tertile. Significant effect estimates are indicated in **bold**.

Protein intakes are energy-adjusted using the residual method. Tertiles are computed based on the total population for analysis (Figure 1, *n*=2,965).

Abbreviations: SDS, standard deviation score; BF%, body fat percentage; SBP, systolic blood pressure; DBP, diastolic blood pressure; HDL-C, high-density lipoprotein cholesterol.

**Supplemental Table S5. Covariate-adjusted associations of animal and vegetable protein intake at the age of 1 year with cardiometabolic outcomes at 6 years.**

|                                     | <b>BF%<br/>(SDS)</b>     | <b>Insulin<br/>(SDS)</b> | <b>SBP<br/>(SDS)</b> | <b>DBP<br/>(SDS)</b>     | <b>HDL-C<br/>(SDS)</b> | <b>Triglycerides<br/>(SDS)</b> | <b>Cardiometabolic<br/>risk factor score</b> |
|-------------------------------------|--------------------------|--------------------------|----------------------|--------------------------|------------------------|--------------------------------|----------------------------------------------|
| <b>Girls</b>                        | <i>n</i> = 1,487         | <i>n</i> = 980           | <i>n</i> = 1,426     | <i>n</i> = 1,457         | <i>n</i> = 1,457       | <i>n</i> = 984                 | <i>n</i> = 982                               |
| <b>Animal protein intake (g)</b>    |                          |                          |                      |                          |                        |                                |                                              |
| <i>Per 10 g/d</i>                   | <b>0.07 (0.01, 0.13)</b> | <b>0.09 (0.00, 0.17)</b> | -0.01 (-0.08, 0.05)  | -0.02 (-0.08, 0.05)      | -0.04 (-0.12, 0.04)    | 0.02 (-0.06, 0.11)             | 0.09 (-0.11, 0.30)                           |
| Tertile 1                           | Reference                | Reference                | Reference            | Reference                | Reference              | Reference                      | Reference                                    |
| Tertile 2                           | 0.02 (-0.08, 0.12)       | -0.04 (-0.19, 0.11)      | -0.08 (-0.20, 0.05)  | -0.02 (-0.14, 0.10)      | 0.08 (-0.07, 0.23)     | 0.03 (-0.12, 0.18)             | -0.21 (-0.60, 0.18)                          |
| Tertile 3                           | <b>0.10 (0.00, 0.21)</b> | <b>0.14 (0.00, 0.29)</b> | -0.01 (-0.14, 0.12)  | -0.05 (-0.17, 0.08)      | 0.01 (-0.15, 0.16)     | 0.06 (-0.11, 0.22)             | 0.13 (-0.27, 0.54)                           |
| P for trend <sup>#</sup>            | 0.06                     | 0.09                     | 0.82                 | 0.48                     | 0.94                   | 0.52                           | 0.52                                         |
| <b>Vegetable protein intake (g)</b> |                          |                          |                      |                          |                        |                                |                                              |
| <i>Per 10 g/d</i>                   | 0.03 (-0.07, 0.13)       | <b>0.14 (0.00, 0.28)</b> | -0.01 (-0.13, 0.11)  | -0.04 (-0.15, 0.08)      | 0.12 (-0.03, 0.27)     | -0.09 (-0.24, 0.06)            | -0.20 (-0.58, 0.17)                          |
| Tertile 1                           | Reference                | Reference                | Reference            | Reference                | Reference              | Reference                      | Reference                                    |
| Tertile 2                           | -0.02 (-0.13, 0.08)      | 0.14 (-0.01, 0.29)       | -0.07 (-0.19, 0.05)  | 0.04 (-0.08, 0.16)       | 0.06 (-0.09, 0.21)     | -0.08 (-0.24, 0.07)            | -0.04 (-0.43, 0.35)                          |
| Tertile 3                           | -0.02 (-0.13, 0.09)      | <b>0.16 (0.00, 0.32)</b> | -0.02 (-0.15, 0.11)  | -0.05 (-0.18, 0.08)      | 0.08 (-0.08, 0.24)     | -0.05 (-0.21, 0.11)            | -0.12 (-0.53, 0.29)                          |
| P for trend <sup>#</sup>            | 0.72                     | <b>0.05</b>              | 0.73                 | 0.50                     | 0.35                   | 0.53                           | 0.58                                         |
| <b>Boys</b>                         | <i>n</i> = 1,422         | <i>n</i> = 1,016         | <i>n</i> = 1,381     | <i>n</i> = 1,384         | <i>n</i> = 1,384       | <i>n</i> = 1,017               | <i>n</i> = 1,013                             |
| <b>Animal protein intake (g)</b>    |                          |                          |                      |                          |                        |                                |                                              |
| <i>Per 10 g/d</i>                   | -0.01 (-0.06, 0.05)      | -0.03 (-0.10, 0.05)      | -0.02 (-0.08, 0.05)  | -0.05 (-0.11, 0.01)      | 0.07 (-0.01, 0.14)     | <b>-0.11 (-0.18, -0.03)</b>    | <b>-0.23 (-0.42, -0.04)</b>                  |
| Tertile 1                           | Reference                | Reference                | Reference            | Reference                | Reference              | Reference                      | Reference                                    |
| Tertile 2                           | -0.06 (-0.17, 0.05)      | 0.03 (-0.13, 0.18)       | -0.02 (-0.14, 0.10)  | -0.05 (-0.17, 0.08)      | -0.01 (-0.17, 0.14)    | -0.10 (-0.26, 0.05)            | -0.23 (-0.62, 0.54)                          |
| Tertile 3                           | 0.00 (-0.11, 0.11)       | -0.04 (-0.19, 0.11)      | 0.00 (-0.12, 0.12)   | -0.07 (-0.20, 0.06)      | 0.10 (-0.05, 0.26)     | <b>-0.20 (-0.35, -0.05)</b>    | -0.34 (-0.72, 0.04)                          |
| P for trend <sup>#</sup>            | 0.99                     | 0.57                     | 0.94                 | 0.33                     | 0.19                   | <b>&lt;0.01</b>                | 0.08                                         |
| <b>Vegetable protein intake (g)</b> |                          |                          |                      |                          |                        |                                |                                              |
| <i>Per 10 g/d</i>                   | -0.01 (-0.12, 0.10)      | -0.05 (-0.21, 0.11)      | 0.02 (-0.10, 0.15)   | -0.06 (-0.19, 0.07)      | 0.09 (-0.07, 0.25)     | -0.07 (-0.22, 0.09)            | -0.15 (-0.54, 0.24)                          |
| Tertile 1                           | Reference                | Reference                | Reference            | Reference                | Reference              | Reference                      | Reference                                    |
| Tertile 2                           | -0.01 (-0.13, 0.10)      | -0.05 (-0.21, 0.11)      | 0.10 (-0.02, 0.23)   | <b>0.15 (0.01, 0.28)</b> | -0.05 (-0.21, 0.11)    | -0.08 (-0.24, 0.08)            | 0.09 (-0.30, 0.49)                           |
| Tertile 3                           | -0.01 (-0.13, 0.10)      | -0.03 (-0.19, 0.13)      | 0.08 (-0.05, 0.20)   | -0.01 (-0.14, 0.12)      | 0.02 (-0.15, 0.18)     | -0.05 (-0.21, 0.11)            | -0.02 (-0.41, 0.37)                          |
| P for trend <sup>#</sup>            | 0.88                     | 0.73                     | 0.26                 | 0.74                     | 0.78                   | 0.57                           | 0.89                                         |

Values are based on multivariable linear regression models and reflect differences (95%CI) in individual cardiometabolic outcomes (age and sex adjusted SD scores) and in cardiometabolic score score per 10 g/d increase in protein intake, and for tertiles of protein intake, as compared to the lowest tertile. Significant effect estimates are indicated in **bold**.

*Protein intakes are energy-adjusted using the residual method. Tertiles are computed based on the total population for analysis (Figure 1, n=2,965).*

*Models are adjusted for maternal age, BMI, education, and smoking during pregnancy; and child's ethnicity, birth weight Z-score, breastfeeding in the first four months of life, age at dietary measurement, energy intake, fat intake, height-for-age at 6y, participation in sports at 6y, and screen time at 6y. Models with animal protein intake are additionally adjusted for vegetable protein intake and vice versa.*

*# Tests for trend were conducted using the tertiles of protein intake as a continuous variable.*

*Abbreviations: SDS, standard deviation score; BF%, body fat percentage; SBP, systolic blood pressure; DBP, diastolic blood pressure; HDL-C, high-density lipoprotein cholesterol.*

**Supplemental Table S6. Covariate-adjusted associations of total protein intake at the age of 1 year with cardiometabolic outcomes at 6 years, in Dutch children only.**

|                          | <b>BF%</b><br>(SDS)      | <b>Insulin</b><br>(SDS)  | <b>SBP</b><br>(SDS) | <b>DBP</b><br>(SDS)         | <b>HDL-C</b><br>(SDS) | <b>Triglycerides</b><br>(SDS) | <b>Cardiometabolic risk factor score</b> |
|--------------------------|--------------------------|--------------------------|---------------------|-----------------------------|-----------------------|-------------------------------|------------------------------------------|
| <b>Whole group</b>       | <i>n</i> = 1,957         | <i>n</i> = 1,348         | <i>n</i> = 1,925    | <i>n</i> = 1,925            | <i>n</i> = 1,355      | <i>n</i> = 1,352              | <i>n</i> = 1,289                         |
| <i>Per 10 g/d</i>        | 0.04 (-0.01, 0.08)       | 0.02 (-0.05, 0.08)       | -0.03 (-0.09, 0.02) | -0.06 (-0.11, 0.00)         | 0.02 (-0.05, 0.09)    | -0.05 (-0.12, 0.02)           | -0.05 (-0.22, 0.12)                      |
| Tertile 1                | Reference                | Reference                | Reference           | Reference                   | Reference             | Reference                     | Reference                                |
| Tertile 2                | 0.01 (-0.04, 0.19)       | 0.06 (-0.07, 0.19)       | -0.10 (-0.20, 0.00) | <b>-0.11 (-0.21, -0.01)</b> | -0.05 (-0.18, 0.09)   | 0.01 (-0.13, 0.14)            | -0.07 (-0.37, 0.24)                      |
| Tertile 3                | 0.06 (-0.03, 0.14)       | 0.01 (-0.12, 0.14)       | -0.08 (-0.18, 0.03) | <b>-0.15 (-0.25, -0.05)</b> | 0.04 (-0.09, 0.17)    | -0.08 (-0.21, 0.06)           | -0.25 (-0.56, 0.05)                      |
| P for trend <sup>#</sup> | 0.12                     | 0.85                     | 0.14                | <b>&lt;0.01</b>             | 0.56                  | 0.26                          | 0.44                                     |
| <b>Girls</b>             | <i>n</i> = 984           | <i>n</i> = 645           | <i>n</i> = 971      | <i>n</i> = 971              | <i>n</i> = 649        | <i>n</i> = 647                | <i>n</i> = 613                           |
| <i>Per 10 g/d</i>        | <b>0.06 (0.00, 0.13)</b> | <b>0.11 (0.01, 0.21)</b> | -0.05 (-0.13, 0.03) | -0.06 (-0.13, 0.02)         | 0.02 (-0.08, 0.12)    | -0.02 (-0.12, 0.08)           | 0.00 (-0.25, 0.25)                       |
| Tertile 1                | Reference                | Reference                | Reference           | Reference                   | Reference             | Reference                     | Reference                                |
| Tertile 2                | 0.08 (-0.04, 0.19)       | 0.09 (-0.10, 0.27)       | -0.05 (-0.20, 0.09) | -0.07 (-0.21, 0.08)         | -0.08 (-0.26, 0.11)   | 0.03 (-0.16, 0.22)            | 0.19 (-0.27, 0.65)                       |
| Tertile 3                | 0.07 (-0.04, 0.19)       | 0.16 (-0.03, 0.35)       | -0.10 (-0.25, 0.06) | -0.11 (-0.26, 0.03)         | 0.04 (-0.16, 0.23)    | 0.04 (-0.16, 0.23)            | 0.02 (-0.45, 0.50)                       |
| P for trend <sup>#</sup> | 0.23                     | 0.10                     | 0.21                | 0.13                        | 0.73                  | 0.71                          | 0.91                                     |
| <b>Boys</b>              | <i>n</i> = 973           | <i>n</i> = 703           | <i>n</i> = 954      | <i>n</i> = 954              | <i>n</i> = 706        | <i>n</i> = 705                | <i>n</i> = 676                           |
| <i>Per 10 g/d</i>        | 0.00 (-0.06, 0.06)       | -0.05 (-0.14, 0.04)      | -0.02 (-0.09, 0.06) | -0.06 (-0.14, 0.01)         | 0.03 (-0.06, 0.12)    | <b>-0.09 (-0.18, 0.00)</b>    | -0.14 (-0.36, 0.08)                      |
| Tertile 1                | Reference                | Reference                | Reference           | Reference                   | Reference             | Reference                     | Reference                                |
| Tertile 2                | -0.08 (-0.20, 0.04)      | 0.00 (-0.18, 0.18)       | -0.14 (-0.28, 0.01) | <b>-0.15 (-0.30, 0.00)</b>  | -0.02 (-0.20, 0.17)   | -0.04 (-0.23, 0.14)           | -0.21 (-0.65, 0.23)                      |
| Tertile 3                | 0.02 (-0.10, 0.14)       | -0.11 (-0.29, 0.07)      | -0.07 (-0.22, 0.08) | <b>-0.19 (-0.34, -0.04)</b> | 0.05 (-0.14, 0.23)    | <b>-0.20 (-0.38, -0.01)</b>   | -0.33 (-0.76, 0.11)                      |
| P for trend <sup>#</sup> | 0.73                     | 0.21                     | 0.36                | <b>0.01</b>                 | 0.61                  | <b>0.03</b>                   | 0.14                                     |

Values are based on multivariable linear regression models and reflect differences (95%CI) in individual cardiometabolic outcomes (age and sex adjusted SD scores) and in cardiometabolic risk score per 10 g/d increase in protein intake, and for tertiles of protein intake, as compared to the lowest tertile. Significant effect estimates are indicated in **bold**.

Protein intakes are energy-adjusted using the residual method. Tertiles are computed based on the total population for analysis (Figure 1, *n*=2,965).

Models are adjusted for maternal age, BMI, education, and smoking during pregnancy; and child's birth weight Z-score, breastfeeding in the first four months of life, age at dietary measurement, energy intake, fat intake, height-for-age at 6y, participation in sports at 6y, and screen time at 6y.

<sup>#</sup> Tests for trend were conducted using the tertiles of protein intake as a continuous variable.

Abbreviations: SDS, standard deviation score; BF%, body fat percentage; SBP, systolic blood pressure; DBP, diastolic blood pressure; HDL-C, high-density lipoprotein cholesterol.

**Supplemental Table S7. Covariate-adjusted associations of protein intake at the age of 2 years with cardiometabolic outcomes at 6 years.**

|                          | <b>BF%<br/>(SDS)</b>       | <b>Insulin<br/>(SDS)</b> | <b>SBP<br/>(SDS)</b> | <b>DBP<br/>(SDS)</b> | <b>HDL-C<br/>(SDS)</b>   | <b>Triglycerides<br/>(SDS)</b> | <b>Cardiometabolic<br/>risk factor score</b> |
|--------------------------|----------------------------|--------------------------|----------------------|----------------------|--------------------------|--------------------------------|----------------------------------------------|
| <b>Whole group</b>       | <i>n</i> = 698             | <i>n</i> = 473           | <i>n</i> = 685       | <i>n</i> = 685       | <i>n</i> = 475           | <i>n</i> = 474                 | <i>n</i> = 450                               |
| <i>Per 10 g/d</i>        | -0.08 (-0.17, 0.02)        | -0.03 (-0.19, 0.13)      | -0.06 (-0.18, 0.07)  | -0.09 (-0.22, 0.04)  | 0.03 (-0.14, 0.20)       | -0.06 (-0.22, 0.11)            | -0.24 (-0.64, 0.16)                          |
| Tertile 1                | Reference                  | Reference                | Reference            | Reference            | Reference                | Reference                      | Reference                                    |
| Tertile 2                | -0.07 (-0.21, 0.07)        | 0.05 (-0.17, 0.28)       | -0.08 (-0.26, 0.11)  | -0.08 (-0.26, 0.11)  | 0.01 (-0.24, 0.25)       | -0.01 (-0.24, 0.23)            | -0.29 (-0.87, 0.29)                          |
| Tertile 3                | -0.14 (-0.29, 0.01)        | -0.05 (-0.29, 0.18)      | 0.00 (-0.20, 0.19)   | -0.11 (-0.31, 0.08)  | 0.04 (-0.21, 0.30)       | -0.05 (-0.29, 0.20)            | -0.24 (-0.84, 0.37)                          |
| P for trend <sup>#</sup> | 0.06                       | 0.67                     | 0.96                 | 0.25                 | 0.73                     | 0.70                           | 0.44                                         |
| <b>Girls</b>             | <i>n</i> = 348             | <i>n</i> = 236           | <i>n</i> = 344       | <i>n</i> = 344       | <i>n</i> = 238           | <i>n</i> = 238                 | <i>n</i> = 227                               |
| <i>Per 10 g/d</i>        | -0.05 (-0.19, 0.08)        | 0.00 (-0.22, 0.22)       | -0.13 (-0.31, 0.05)  | -0.11 (-0.28, 0.06)  | -0.07 (-0.31, 0.17)      | 0.08 (-0.16, 0.31)             | -0.01 (-0.60, 0.57)                          |
| Tertile 1                | Reference                  | Reference                | Reference            | Reference            | Reference                | Reference                      | Reference                                    |
| Tertile 2                | 0.01 (-0.19, 0.20)         | 0.11 (-0.22, 0.43)       | -0.24 (-0.01, 0.02)  | -0.13 (-0.37, 0.12)  | -0.29 (-0.64, 0.06)      | 0.08 (-0.27, 0.42)             | -0.04 (-0.88, 0.80)                          |
| Tertile 3                | -0.08 (-0.29, 0.13)        | 0.03 (-0.32, 0.38)       | -0.10 (-0.38, 0.87)  | -0.20 (-0.46, 0.06)  | -0.07 (-0.43, 0.30)      | 0.16 (-0.20, 0.53)             | 0.00 (-0.91, 0.91)                           |
| P for trend <sup>#</sup> | 0.45                       | 0.19                     | 0.45                 | 0.13                 | 0.69                     | 0.38                           | 0.99                                         |
| <b>Boys</b>              | <i>n</i> = 350             | <i>n</i> = 237           | <i>n</i> = 341       | <i>n</i> = 341       | <i>n</i> = 237           | <i>n</i> = 236                 | <i>n</i> = 223                               |
| <i>Per 10 g/d</i>        | -0.12 (-0.26, 0.02)        | -0.07 (-0.31, 0.17)      | 0.00 (-0.18, 0.17)   | -0.09 (-0.28, 0.10)  | 0.19 (-0.07, 0.44)       | -0.20 (-0.44, 0.04)            | <b>-0.60 (-1.20, 0.00)</b>                   |
| Tertile 1                | Reference                  | Reference                | Reference            | Reference            | Reference                | Reference                      | Reference                                    |
| Tertile 2                | -0.16 (-0.37, 0.05)        | 0.04 (-0.29, 0.37)       | 0.06 (-0.20, 0.33)   | -0.05 (-0.33, 0.24)  | <b>0.38 (0.03, 0.73)</b> | -0.13 (-0.47, 0.20)            | -0.62 (-1.47, 0.22)                          |
| Tertile 3                | <b>-0.22 (-0.43, 0.00)</b> | -0.13 (-0.46, 0.21)      | 0.06 (-0.21, 0.33)   | -0.05 (-0.34, 0.24)  | 0.18 (-0.18, 0.54)       | -0.21 (-0.55, 0.14)            | -0.50 (-1.36, 0.36)                          |
| P for trend <sup>#</sup> | <b>&lt;0.05</b>            | 0.46                     | 0.65                 | 0.74                 | 0.35                     | 0.24                           | 0.26                                         |

Values are based on multivariable linear regression models and reflect differences (95%CI) in individual cardiometabolic outcomes (age and sex adjusted SD scores) and in cardiometabolic score score per 10 g/d increase in protein intake, and for tertiles of protein intake, as compared to the lowest tertile. Significant effect estimates are indicated in **bold**.

Protein intakes are energy-adjusted using the residual method. Tertiles are computed based on the total population for analysis for diet at 2 years (Figure S1, *n*=714).

Models are adjusted for maternal age, BMI, education, and smoking during pregnancy; and child's ethnicity, birth weight Z-score, breastfeeding in the first four months of life, age at dietary measurement, energy intake at 2y, fat intake at 2y, height-for-age at 6y, participation in sports at 6y, and screen time at 6y.

<sup>#</sup> Tests for trend were conducted using the tertiles of protein intake as a continuous variable.

Abbreviations: SDS, standard deviation score; BF%, body fat percentage; SBP, systolic blood pressure; DBP, diastolic blood pressure; HDL-C, high-density lipoprotein cholesterol.
